# Supplementary material for: A Colorimetric/Fluorescent Dual-Mode Aptasensor for Salmonella Based on the Magnetic Separation of Aptamers and a DNA-Nanotriangle Programmed Multivalent Aptamer
Source: MDPI journal article supplement (doi:10.3390/foods12203853), 2023-10-20
Supplement: s1 [file s1]

## **Supplementary Materials**

### **A colorimetric/fluorescent dual-mode aptasensor of *Salmonella* based on aptamer magnetic separation and DNA nanotriangle programmed multivalent aptamer**

Na Ma<sup>1,2</sup>, Mengni Sun<sup>1,2</sup>, Hanxing Shi<sup>1,2</sup>, Liangliang Xue<sup>1,2</sup>, Min Zhang<sup>1,2</sup>, Wenge Yang<sup>1,2</sup>, Yali Dang<sup>1,2</sup>, Zhaohui Qiao<sup>1,2\*</sup>

1. College of Food and Pharmaceutical Sciences, Ningbo University, Ningbo 315800, China

2. Zhejiang-Malaysia Joint Research Laboratory for Agricultural Product Processing and Nutrition, Ningbo University, Ningbo 315800, China

**\*Corresponding author**

College of Food and Pharmaceutical Sciences, Ningbo University, Ningbo 315800

Email: [qiaozhaohui@nbu.edu.cn](mailto:qiaozhaohui@nbu.edu.cn)

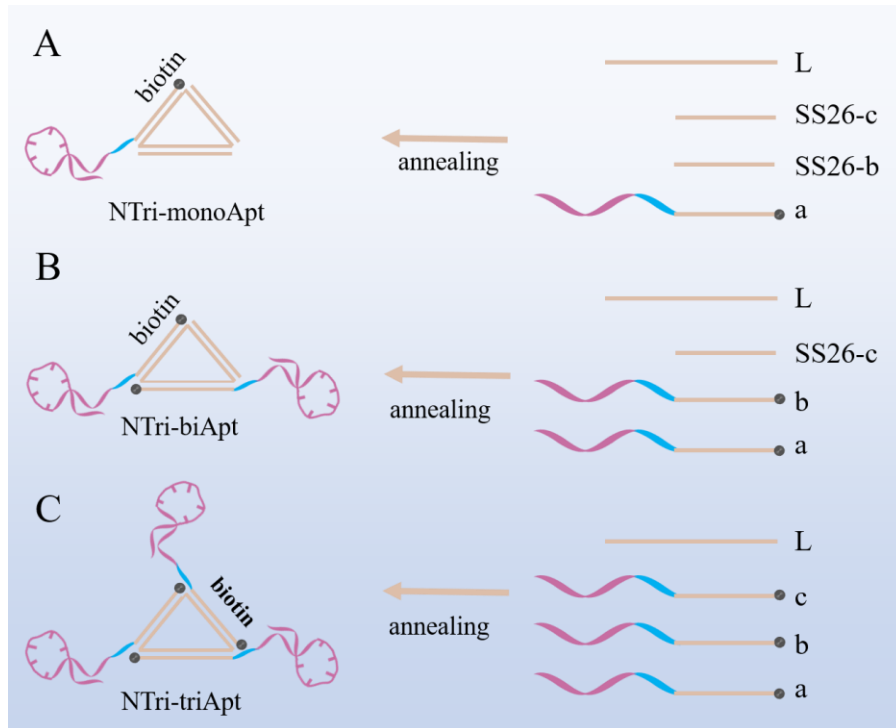

**Figure. S1** Illustration of the preparation processes of (A) NTri-monoApt, (B) NTri-biApt, (C) NTri-triApt.

### Preparation of linear trivalent aptamers.

All DNA sequences used for linear trivalent aptamers were listed in Table S3. Briefly, eight short ssDNAs were prepared and classified into two categories: linker DNA (1-3 black lines) and spacer DNA (a-b red lines). After hybridization, the spacer DNAs can be sequentially connected through the linker DNA, leaving a gap of 26 bp between each spacer DNA, which just connects with the 26 bp extension fragment of the aptamer. In this way, linear trivalent aptamers were prepared, keeping the aptamer spacing consistent with planar NTri-Multi-Apt.

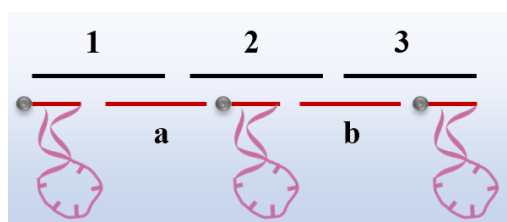

**Figure. S2.** Schematic design of linear trivalent aptamer.

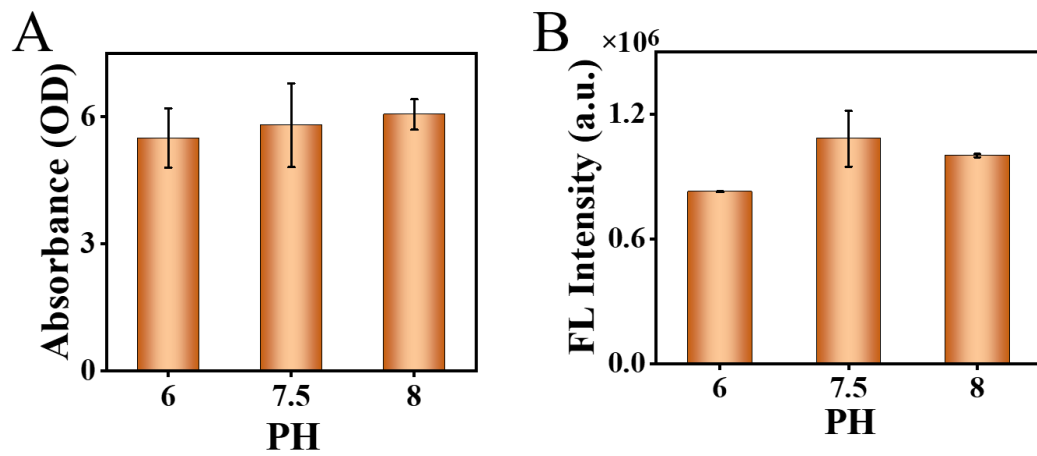

**Figure. S3.** The effect of pH on the colorimetric (A) and fluorescent (B) detection.

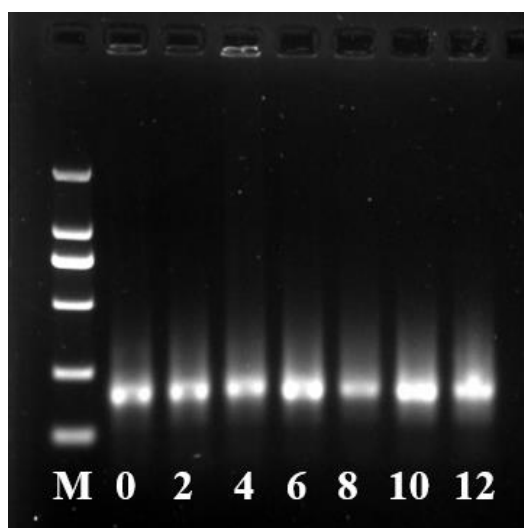

**Figure. S4.** Agarose gel electrophoresis analysis of NTri-Multi-Apt under different storage durations (0, 2, 4, 6, 8, and 12 days) at 4°C.

**Table S1.** Sequences information for the nucleic acids of NTri-Multi-Apts in this study.

| Name       | Sequences (5' to 3')                                                                   |
|------------|----------------------------------------------------------------------------------------|
| L          | GATGACTCGGCTTTCAGTCTAACGCTGACGTAGGCCCTTCGTAGGACCT<br>TGCCATGATAGGCCCTTGCTCAGTAGACACCC  |
| a          | Biotin-TCTAGGGCCTACGTCAGCGTTAGACTGAACAAAACCTGGGCGGTT<br>GGTGTGATGGGCTTTTTTCGTTGGGCCGG  |
| b          | Biotin-TATGCCGAGTCATCGGGTGTCTACTGAGCCAAAACCTGGGCGGTT<br>GGTGTGATGGGCTTTTTTCGTTGGGCCGG  |
| c          | Biotin-TGTAGGGCCTATCATGGCAAGGTCCTACGCAAAAACCTGGGCGGTT<br>GGTGTGATGGGCTTTTTTCGTTGGGCCGG |
| S26-a      | FAM-TCTAGGGCCTACGTCAGCGTTAGACTGAACAAAACCTGGGCGGTT<br>GGTGTGATGGGCTTTTTTCGTTGGGCCGG     |
| S26-b      | FAM-TATGCCGAGTCATCGGGTGTCTACTGAGCCAAAACCTGGGCGGTT<br>GGTGTGATGGGCTTTTTTCGTTGGGCCGG     |
| S26-c      | FAM-TGTAGGGCCTATCATGGCAAGGTCCTACGCAAAAACCTGGGCGGTT<br>GGTGTGATGGGCTTTTTTCGTTGGGCCGG    |
| SS26-b     | GCCGAGTCATCGGGTGTCTACTGAGC                                                             |
| SS26-c     | AGGGCCTATCATGGCAAGGTCCTACG                                                             |
| Biotin-Apt | biotin-TTTTTTTTTTTTTTCTTGGGCGGTTGGTGTGATGGGCTTTTTTCG<br>TTGGGCCGG                      |

**Table S2.** Sequence information for the nucleic acids of NTri-Multi-Apt with different interval lengths in this study.

| Name  | Sequences (5' to 3')                                                                                     |
|-------|----------------------------------------------------------------------------------------------------------|
| L21   | GATGACTCGTTTCAGTCTAACGCTGACGTAGTCGTAGGACCTTGCCATGAT<br>AGTGCTCAGTAGACA                                   |
| S21-a | Biotin-TCTCTACGTCAGCGTTAGACTGAACAAAACCTTGGGCGGTTGGTGTG<br>ATGGGCTTTTTTCGTTGGGCCGG                        |
| S21-b | Biotin-TATCGAGTCATCTGTCTACTGAGCCAAAACCTTGGGCGGTTGGTGTG<br>ATGGGCTTTTTTCGTTGGGCCGG                        |
| S21-c | Biotin-TGTCTATCATGGCAAGGTCCTACGCAAAAACCTTGGGCGGTTGGTGTG<br>ATGGGCTTTTTTCGTTGGGCCGG                       |
| L26   | GATGACTCGGCTTTCAGTCTAACGCTGACGTAGGCCCTTCGTAGGACCTT<br>GCCATGATAGGCCCTTGCTCAGTAGACACCC                    |
| S26-a | Biotin-TCTAGGGCCTACGTCAGCGTTAGACTGAACAAAACCTTGGGCGGTT<br>GGTGTGATGGGCTTTTTTCGTTGGGCCGG                   |
| S26-b | Biotin-TATGCCGAGTCATCGGGTGTCTACTGAGCCAAAACCTTGGGCGGTT<br>GGTGTGATGGGCTTTTTTCGTTGGGCCGG                   |
| S26-c | Biotin-TGTAGGGCCTATCATGGCAAGGTCCTACGCAAAAACCTTGGGCGGTT<br>GGTGTGATGGGCTTTTTTCGTTGGGCCGG                  |
| L32   | GATGACTCGGCCAATTTTCAGTCTAACGCTGACGTAGGCCCTACCAAATCG<br>TAGGACCTTGCCATGATAGGCCCTACCAAATGCTCAGTAGACACCCATA |
| S32-a | Biotin-TCTTTTGGTAGGGCCTACGTCAGCGTTAGACTGAACAAAACCTTGGG<br>CGGTTGGTGTGATGGGCTTTTTTCGTTGGGCCGG             |
| S32-b | Biotin-TATTTGGCCGAGTCATCTATGGGTGTCTACTGAGCCAAAACCTTGGG<br>CGGTTGGTGTGATGGGCTTTTTTCGTTGGGCCGG             |
| S32-c | Biotin-TGTTTTGGTAGGGCCTATCATGGCAAGGTCCTACGCAAAAACCTTGGG<br>CGGTTGGTGTGATGGGCTTTTTTCGTTGGGCCGG            |

**Table S3.** Sequence information for the nucleic acids of linear trivalent aptamer in this study.

| Name | Sequences (5' to 3')                                                    |
|------|-------------------------------------------------------------------------|
| 1    | GCGTCCAGCTCAGGCTACGTACACTTC                                             |
| 2    | ATGATGAGGGAGCAGTAGGCGTCGGT                                              |
| 3    | CAGGTACGGACAGCGTC                                                       |
| Apt1 | Biotin-GAAGTGTACGTAGCCTGATTCTTGGGCGGTTGGTGTGATG<br>GGCTTTTTTCGTTGGGCCGG |
| Apt2 | Biotin-TACTGCTCTTCTTGGGCGGTTGGTGTGATGGGCTTTTTTCG<br>TTGGGCCGG           |
| Apt3 | Biotin-CGTACCTGTTCTTGGGCGGTTGGTGTGATGGGCTTTTTTCG<br>TTGGGCCGG           |
| A    | GCTGGACGCACCGACGCC                                                      |
| B    | CCTCATCATGACGCTGTC                                                      |



**Table S4.** Sequence information for the nucleic acids of S1, S2, S3 and the corresponding DNA sequences that make up the NTri-Multi-Apt.

| Name    | Sequences (5' to 3')                                                                  |
|---------|---------------------------------------------------------------------------------------|
| S1      | CTTGGGCGGTTGGTGTGATGGGCTTTTTTCGTTGGGCCGG                                              |
| S2      | TATGGCGGCGTCACCCGACGGGGACTTGACATTATGACAG                                              |
| S3      | GAGTTAATCAATACAAGGCGGGAACATCCTTGGCGGTGC                                               |
| L-d     | GATGACTCGGCTTTCAGTCTAACGCTGACGTAGGCCCTTCGTAGGA<br>CCTTGCCATGATAGGCCCTTGCTCAGTAGACACCC |
| S26-1-a | Biotin-TCTAGGGCCTACGTCAGCGTTAGACTGAACAAAACCTGGGCG<br>GTTGGTGTGATGGGCTTTTTTCGTTGGGCCGG |
| S26-1-b | Biotin-TATGCCGAGTCATCGGGTGTCTACTGAGCCAAAACCTGGGCG<br>GTTGGTGTGATGGGCTTTTTTCGTTGGGCCGG |
| S26-1-c | Biotin-TGTAGGGCCTATCATGGCAAGGTCCTACGCAAAACCTGGGCG<br>GTTGGTGTGATGGGCTTTTTTCGTTGGGCCGG |
| S26-2-a | Biotin-TCTAGGGCCTACGTCAGCGTTAGACTGAACAAAATATGGCGG<br>CGTCACCCGACGGGGACTTGACATTATGACAG |
| S26-2-b | Biotin-TATGCCGAGTCATCGGGTGTCTACTGAGCCAAAATATGGCGG<br>CGTCACCCGACGGGGACTTGACATTATGACAG |
| S26-2-c | Biotin-TGTAGGGCCTATCATGGCAAGGTCCTACGCAAAATATGGCGG<br>CGTCACCCGACGGGGACTTGACATTATGACAG |
| S26-3-a | Biotin-TCTAGGGCCTACGTCAGCGTTAGACTGAACAAAAGAGTTAAT<br>CAATACAAGGCGGGAACATCCTTGGCGGTGC  |
| S26-3-b | Biotin-TATGCCGAGTCATCGGGTGTCTACTGAGCCAAAAGAGTTAAT<br>CAATACAAGGCGGGAACATCCTTGGCGGTGC  |
| S26-3-c | Biotin-TGTAGGGCCTATCATGGCAAGGTCCTACGCAAAAGAGTTAAT<br>CAATACAAGGCGGGAACATCCTTGGCGGTGC  |

**Table S5.** Recovery of the proposed colorimetric and fluorescent method in *Salmonella*-spiked samples.

| Sample          | <i>Salmonella</i><br>Spiked<br>(CFU/mL) | Colorimetric         |                 |           | Fluorescent          |                 |           |
|-----------------|-----------------------------------------|----------------------|-----------------|-----------|----------------------|-----------------|-----------|
|                 |                                         | Detected<br>(CFU/mL) | Recovery<br>(%) | CV<br>(%) | Detected<br>(CFU/mL) | Recovery<br>(%) | CV<br>(%) |
| Milk            | 1×10 <sup>2</sup>                       | 98                   | 98.10           | 6.72      | 113                  | 112.83          | 8.54      |
|                 | 1×10 <sup>3</sup>                       | 1164                 | 116.44          | 5.74      | 999                  | 99.89           | 9.53      |
|                 | 1×10 <sup>4</sup>                       | 11549                | 115.49          | 4.25      | 10566                | 105.66          | 5.42      |
| Egg<br>white    | 1×10 <sup>2</sup>                       | 92                   | 92.16           | 9.71      | 103                  | 103.25          | 3.78      |
|                 | 1×10 <sup>3</sup>                       | 1072                 | 107.18          | 8.51      | 1068                 | 106.8           | 7.8       |
|                 | 1×10 <sup>4</sup>                       | 10322                | 103.21          | 9.36      | 11085                | 110.85          | 9.49      |
| Chicken<br>meat | 1×10 <sup>2</sup>                       | 108                  | 108.63          | 8.66      | 94                   | 93.9            | 7.85      |
|                 | 1×10 <sup>3</sup>                       | 1097                 | 109.70          | 4.84      | 1015                 | 101.45          | 5.56      |
|                 | 1×10 <sup>4</sup>                       | 9584                 | 95.84           | 9.03      | 10387                | 103.87          | 6.57      |

**Table S6.** Comparison with different methods of recently developed for *Salmonella* detection.

| Detection method         | Linear range<br>(CFU/mL)              | LOD<br>(CFU/mL)                     | Reference |
|--------------------------|---------------------------------------|-------------------------------------|-----------|
| fluorescent              | $7 \times 10^3 - 3 \times 10^8$       | $1 \times 10^3$                     | [1]       |
| fluorescent              | 1503 - 96938                          | 733 and 464                         | [2]       |
| fluorescent              | $4.9 \times 10^3 - 4.9 \times 10^7$   | $4.9 \times 10^3$                   | [3]       |
| fluorescent              | $10^3 - 10^7$                         | $10^3$                              | [4]       |
| fluorescent              | $4.6 \times 10^2 - 4.6 \times 10^7$   | 82                                  | [5]       |
| Colorimetric             | $1 \times 10^3 - 1 \times 10^8$       | $10^3$                              | [6]       |
| Colorimetric             | $10^5 - 10^8$                         | $10^5$                              | [7]       |
| Colorimetric             | $8 \times 10^1 - 8 \times 10^4$       | 62                                  | [8]       |
| Colorimetric             | $10 - 10^7$                           | 100                                 | [9]       |
| Colorimetric/fluorescent | $1.88 \times 10^4 - 1.88 \times 10^7$ | $1.88 \times 10^4/3.75 \times 10^3$ | [10]      |
| Colorimetric/fluorescent | $10^2 - 10^7$                         | 316/60                              | This work |

## References

1. Zhuang, Q.-Q.; He, S.-B.; Jiang, Y.-C.; Huang, K.-Y.; Xu, Y.-Y.; Peng, H.-P.; Deng, H.-H.; Chen, W. Immunofluorescent-aggregation assay based on anti-*Salmonella typhimurium* IgG-AuNCs, for rapid detection of *Salmonella typhimurium*. *Mikrochim Acta* **2022**, *189*, 160, doi:10.1007/s00604-022-05263-z.
2. Srinivasan, S.; Ranganathan, V.; DeRosa, M.C.; Murari, B.M. Label-free aptasensors based on fluorescent screening assays for the detection of *Salmonella typhimurium*. *Anal. Biochem.* **2018**, *559*, 17-23, doi:10.1016/j.ab.2018.08.002.
3. Ding, S.; Hu, H.; Yue, X.; Feng, K.; Gao, X.; Dong, Q.; Yang, M.; Tamer, U.; Huang, G.; Zhang, J. A fluorescent biosensor based on quantum dot-labeled streptavidin and poly-l-lysine for the rapid detection of *Salmonella* in milk. *J. Dairy Sci.* **2022**, *105*, 2895-2907, doi:10.3168/jds.2021-21229.
4. Yang, L.; Li, Y. Quantum dots as fluorescent labels for quantitative detection of *Salmonella Typhimurium* in chicken carcass wash water. *J. Food Prot.* **2005**, *68*, 1241-1245, doi:10.4315/0362-028x-68.6.1241.
5. Yang, X.; Wang, L.; Pang, L.; Fu, S.; Qin, X.; Chen, Q.; Man, C.; Jiang, Y. A novel fluorescent platform of DNA-stabilized silver nanoclusters based on exonuclease III amplification-assisted detection of *Salmonella Typhimurium*. *Anal. Chim. Acta* **2021**, *1181*, 338903, doi:10.1016/j.aca.2021.338903.
6. Wu, W.; Li, J.; Pan, D.; Li, J.; Song, S.; Rong, M.; Li, Z.; Gao, J.; Lu, J. Gold

- nanoparticle-based enzyme-linked antibody-aptamer sandwich assay for detection of *Salmonella Typhimurium*. *ACS Appl. Mater. Interfaces* **2014**, *6*, 16974-16981, doi:10.1021/am5045828.
7. Wang, Q.-Y.; Kang, Y.-J. Bioprobes based on aptamer and silica fluorescent nanoparticles for bacteria *Salmonella typhimurium* detection. *Nanoscale Res. Lett.* **2016**, *11*, 150, doi:10.1186/s11671-016-1359-z.
  8. Cai, G.; Wang, Y.; Zhang, Y.; Zheng, L.; Lin, J. Magnetorheological elastomer and smartphone enable microfluidic biosensing of foodborne pathogen. *Chin Chem Lett.* **2023**, *34*, 108059, doi:10.1016/j.cclet.2022.108059.
  9. Srisa-Art, M.; Boehle, K.E.; Geiss, B.J.; Henry, C.S. Highly sensitive detection of *Salmonella typhimurium* using a colorimetric paper-based analytical device coupled with immunomagnetic separation. *Anal. Chem.* **2017**, *90*, 1035-1043, doi:10.1021/acs.analchem.7b04628.
  10. Hu, J.; Jiang, Y.-Z.; Tang, M.; Wu, L.-L.; Xie, H.-y.; Zhang, Z.-L.; Pang, D.-W. Colorimetric-fluorescent-magnetic nanosphere-based multimodal assay platform for *Salmonella* Detection. *Anal. Chem.* **2018**, *91*, 1178-1184, doi:10.1021/acs.analchem.8b05154.
